# Supplementary material for: Understanding the catalytic properties for synthesizing NOx derivative NH3 by an alternate gas-switching process
Source: Royal Society of Chemistry journal article supplement (doi:10.1039/d4nj05459h), 2025-01-01
Supplement: d4nj05459h1.pdf [file d4nj05459h1.pdf]

## Supporting Information

### Understanding the catalytic property for synthesizing NO<sub>x</sub> derivative NH<sub>3</sub> by an alternate gas-switching process†

Ryutaro Wakabayashi‡, Yuxiao Zhang‡, Atsuko Tomita, Tatsuo Kimura\*

National Institute of Advanced Industrial Science and Technology (AIST), Sakurazaka, Moriyama-ku, Nagoya 463-8560, Japan.

\*t-kimura@aist.go.jp

**Table S1.** Assignment of peaks due to the resultant cubic CeO<sub>2</sub>-ZrO<sub>2</sub> solid solution

|       | <i>d</i> -spacing (nm) / 2theta (°, Cu Kα) |                                                        |                                                           |
|-------|--------------------------------------------|--------------------------------------------------------|-----------------------------------------------------------|
|       | CeO <sub>2</sub> (reference)               | Pt@mCe <sub>0.8</sub> Zr <sub>0.2</sub> O <sub>2</sub> | Ba/Pt@mCe <sub>0.8</sub> Zr <sub>0.2</sub> O <sub>2</sub> |
| (111) | 0.3132 / 28.5                              | 0.3100 / 28.8                                          | 0.3100 / 28.8                                             |
| (200) | 0.2714 / 33.0                              | 0.2691 / 33.3                                          | 0.2691 / 33.3                                             |
| (220) | 0.1914 / 47.5                              | 0.1892 / 48.1                                          | 0.1899 / 47.9                                             |
| (311) | 0.1634 / 56.3                              | 0.1613 / 57.1                                          | 0.1618 / 56.9                                             |
| (222) | 0.1563 / 59.1                              | 0.1551 / 59.6                                          | 0.1551 / 59.6                                             |
| (400) | 0.1352 / 69.5                              | 0.1342 / 70.1                                          | 0.1342 / 70.1                                             |
| (331) | 0.1242 / 76.7                              | 0.1229 / 77.7                                          | 0.1229 / 77.7                                             |

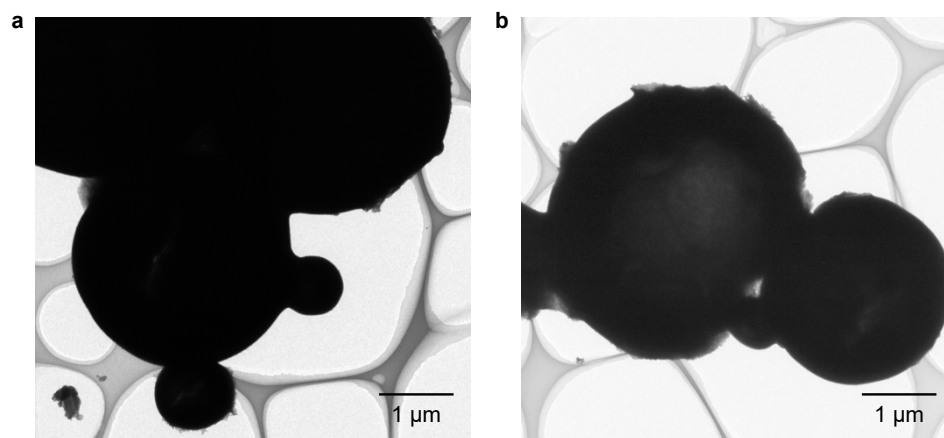

**Fig. S1** Representative bright-field TEM images of (a) Pt@mCe<sub>0.8</sub>Zr<sub>0.2</sub>O<sub>2</sub> and (b) BaO/Pt@mCe<sub>0.8</sub>Zr<sub>0.2</sub>O<sub>2</sub>.

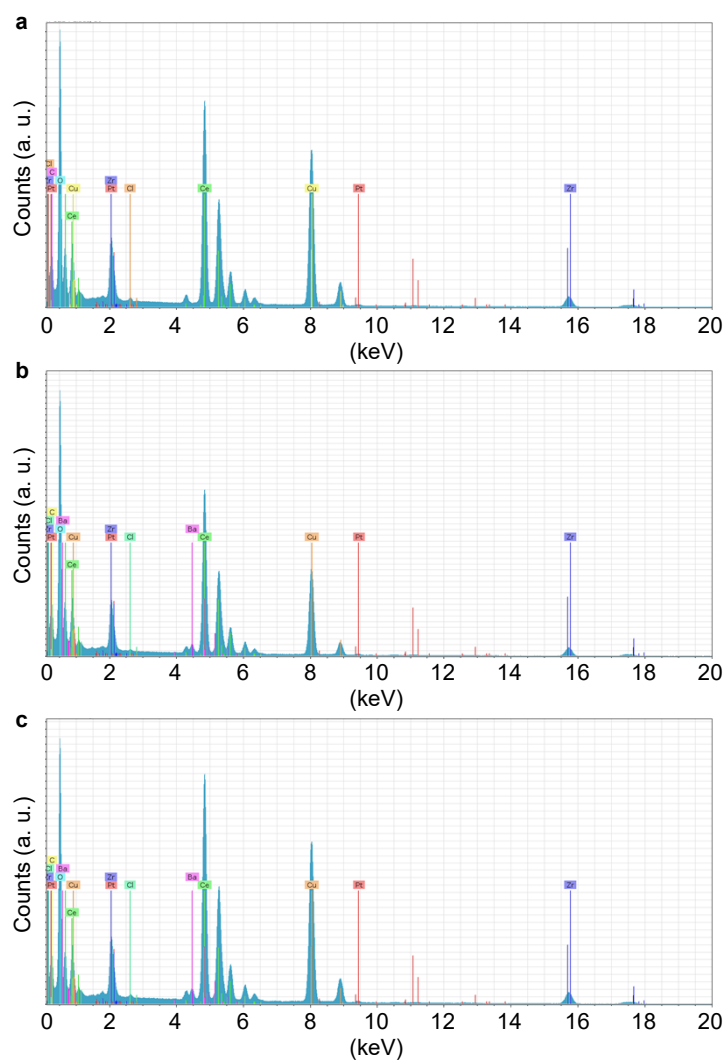

**Fig. S2** EDS spectra of (a) fresh Pt@mCe<sub>0.8</sub>Zr<sub>0.2</sub>O<sub>2</sub>, (b) fresh BaO/Pt@mCe<sub>0.8</sub>Zr<sub>0.2</sub>O<sub>2</sub> and (c) BaO/Pt@mCe<sub>0.8</sub>Zr<sub>0.2</sub>O<sub>2</sub> after the catalytic reactions.

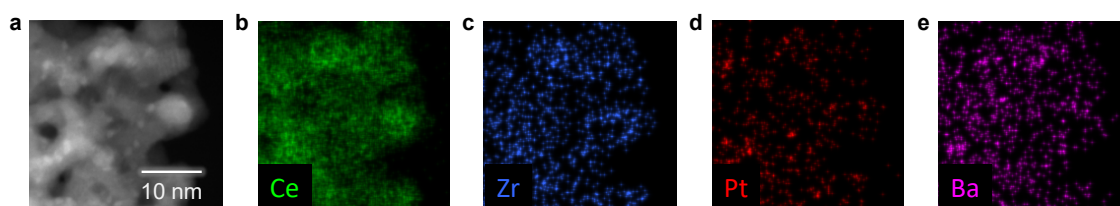

**Fig. S3** (a) HAADF-STEM image with the EDS mappings of (b-e) Ce, Zr, Pt and Ba of BaO/Pt@mCe<sub>0.8</sub>Zr<sub>0.2</sub>O<sub>2</sub> after the 15 cycles of the gas-switching NTA process.
